# Supplementary material for: Effects of mutating aromatic surface residues of the heme domain of human sulfite oxidase on its heme midpoint potential, intramolecular electron transfer, and steady-state kinetics
Source: Royal Society of Chemistry journal article supplement (doi:10.1039/c2dt31508d), 2012-08-29

## Supporting Information

### Effects of Mutating Aromatic Surface Residues of the Heme Domain of Human Sulfite Oxidase on its Heme Midpoint Potential, Intramolecular Electron Transfer, and Steady-State Kinetics

Amanda C. Davis, Matthew J. Cornelison, Kimberly T. Meyers, Asha Rajapakshe,

Robert E. Berry, Gordon Tollin,\* John H. Enemark\*

#### Statistical analysis of $k_{et}$ values

Comparison of the electron transfer rate constants ( $k_{et}$ ) for the six mutants in Figure 5 measured at both pH 7.4 and 6.8, using the program Prism6<sup>®</sup>, showed a significant interaction (two-way analysis of variance, ANOVA,  $p < 0.0001$  for interaction,  $n = 6$ ). Additionally, both the mutation and pH significantly affect the  $k_{et}$  measured ( $p < 0.0001$ ,  $n = 6$ ). A *post hoc* Dunnett's test was performed to determine for which mutants  $k_{et}$  varied significantly compared to the wild type (wt). At pH = 7.4, the F57Y mutant was significantly different from wt ( $p < 0.001$ ,  $n = 6$ ). However, at pH = 6.8, all but the F79A mutant varied significantly compared to wt ( $p < 0.001$ ). The graph summarizes these comparisons.

#### Variation of $k_{et}$ with pH for hSO mutants

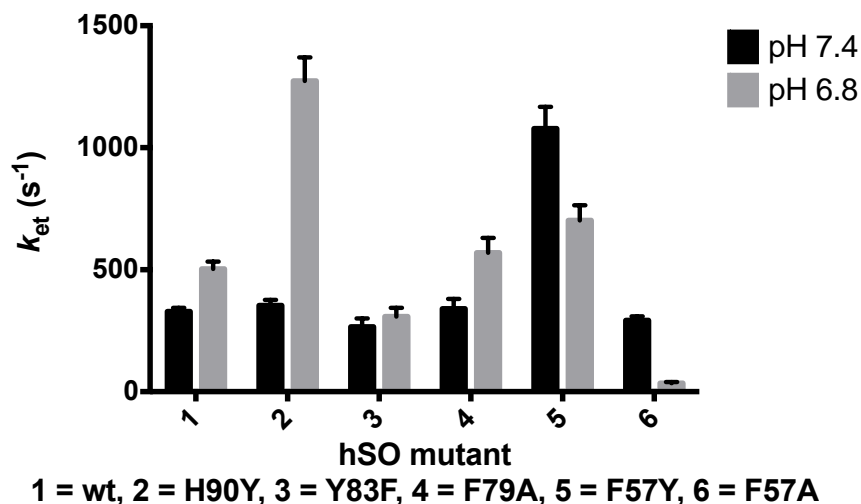

Supplement: c2dt31508d.pdf [file c2dt31508d.pdf]
